# Supplementary material for: Novel thermosensitive telechelic PEGs with antioxidant activity: synthesis, molecular properties and conformational behaviour
Source: Royal Society of Chemistry journal article supplement (doi:10.1039/c4ra06978a), 2014-01-01
Supplement: c4ra06978a1.pdf [file c4ra06978a1.pdf]

Supporting Information

“Novel Thermosensitive Telechelic PEGs With Antioxidant Activity: Synthesis, Molecular Properties and Conformational Behaviour”

*O. Sergeeva, P. Vlasov, N.S. Domnina, A. Bogomolova, P. Konarev, Z. Waltrova, J. Horsky, P. Stepanek and S.K. Filippov*

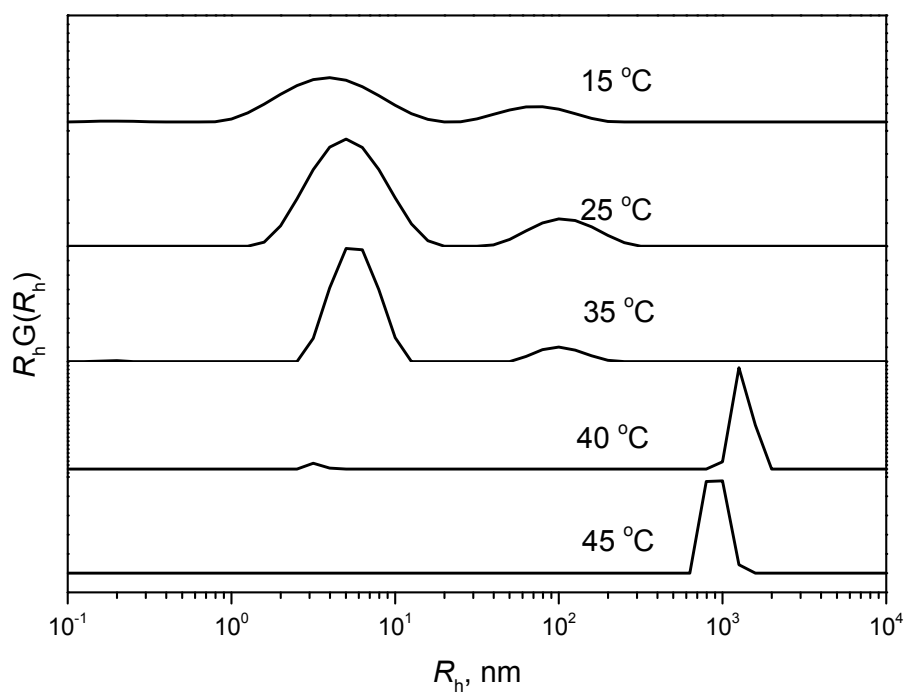

**Figure 1S.** Intensity weighted distribution function of nanoparticles obtained from DLS data for PEG-A (3K) at different temperatures; C=0.5 wt%.

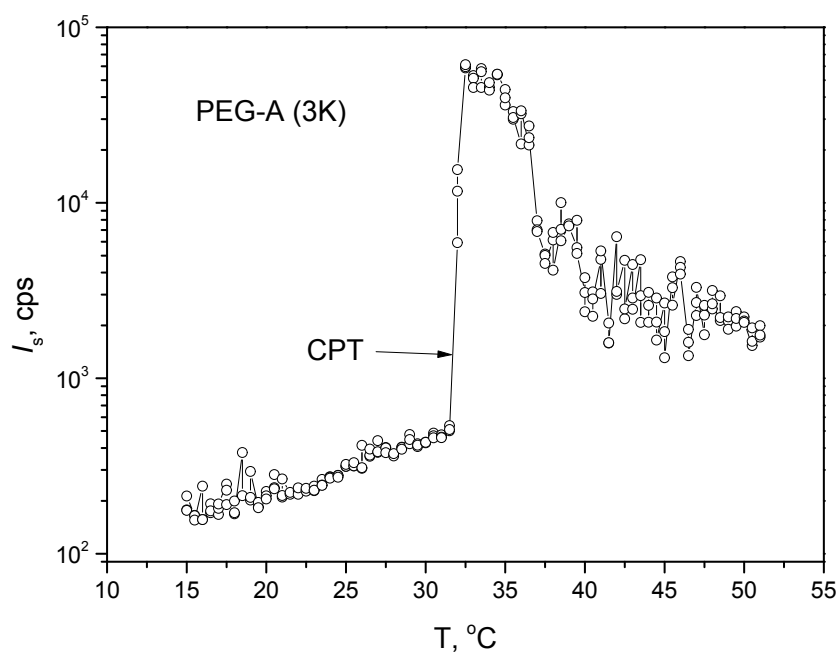

**Figure 2S.** Scattered light intensity  $I_s$  plotted as a function of solution temperature for PEG-A(3k) sample;  $C = 1.0$  wt % .

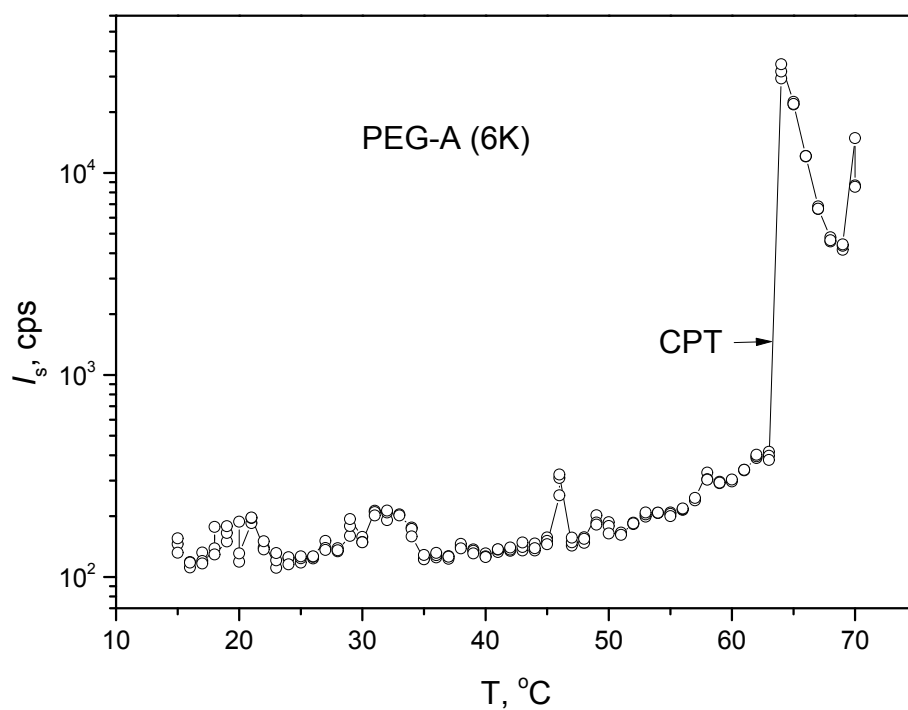

**Figure 3S.** Scattered light intensity  $I_s$  plotted as a function of solution temperature for PEG-A(6k) sample;  $C = 1.0$  wt% .
